# Supplementary material
Source: PubMed Central journal article supplement (PMC7482049)
Supplement: NEU919689_Supplemental_Material.pdf [file NEU919689_Supplemental_Material.pdf]

**Abbreviations:**

ANNA-1 = anti-neuronal nuclear antibody 1

CSF = cerebrospinal fluid

GBS = Guillain-Barre syndrome

IVIg = intravenous immunoglobulin G

PSN = paraneoplastic sensory neuropathy
